# Supplementary material for: Efficacy and Safety of Lebrikizumab, a High-Affinity Interleukin 13 Inhibitor, in Adults With Moderate to Severe Atopic Dermatitis: A Phase 2b Randomized Clinical Trial
Source: PubMed Central journal article supplement — JAMA Dermatol. 2020 Feb 26;156(4):411–20. doi: 10.1001/jamadermatol.2020.0079 (PMC7142380; doi:10.1001/jamadermatol.2020.0079), 2020-02-26
Supplement: jamadermatol-156-411-s003.pdf [file jamadermatol-156-411-s003.pdf]

## Data Sharing Statement

Guttman-Yassky. Efficacy and Safety of Lebrikizumab, a High-Affinity Interleukin 13 Inhibitor, in Adults With Moderate to Severe Atopic Dermatitis. *JAMA Dermatol*. Published February 26, 2020. 10.1001/jamadermatol.2020.0079

### Data

**Data available:** No

### Additional Information

**Explanation for why data not available:** Dermira shares data related to this trial in peer-reviewed journals, medical congresses, and ClinicalTrials.gov. The study protocol is available as part of the public reporting of this manuscript. Individual patient data are not publicly available.
